# Supplementary material for: Dual Inhibition of the Lactate Transporters MCT1 and MCT4 Is Synthetic Lethal with Metformin due to NAD+ Depletion in Cancer Cells
Source: PubMed Central journal article supplement (PMC6302548; doi:10.1016/j.celrep.2018.11.043), 2018-12-11
Supplement: mmc1.pdf [file mmc1.pdf]

**Cell Reports, Volume 25**

**Supplemental Information**

**Dual Inhibition of the Lactate Transporters**

**MCT1 and MCT4 Is Synthetic Lethal with Metformin**

**due to NAD<sup>+</sup> Depletion in Cancer Cells**

**Don Benjamin, Dimitri Robay, Sravanth K. Hindupur, Jens Pohlmann, Marco Colombi, Mahmoud Y. El-Shemerly, Sauveur-Michel Maira, Christoph Moroni, Heidi A. Lane, and Michael N. Hall**

# Figure S1

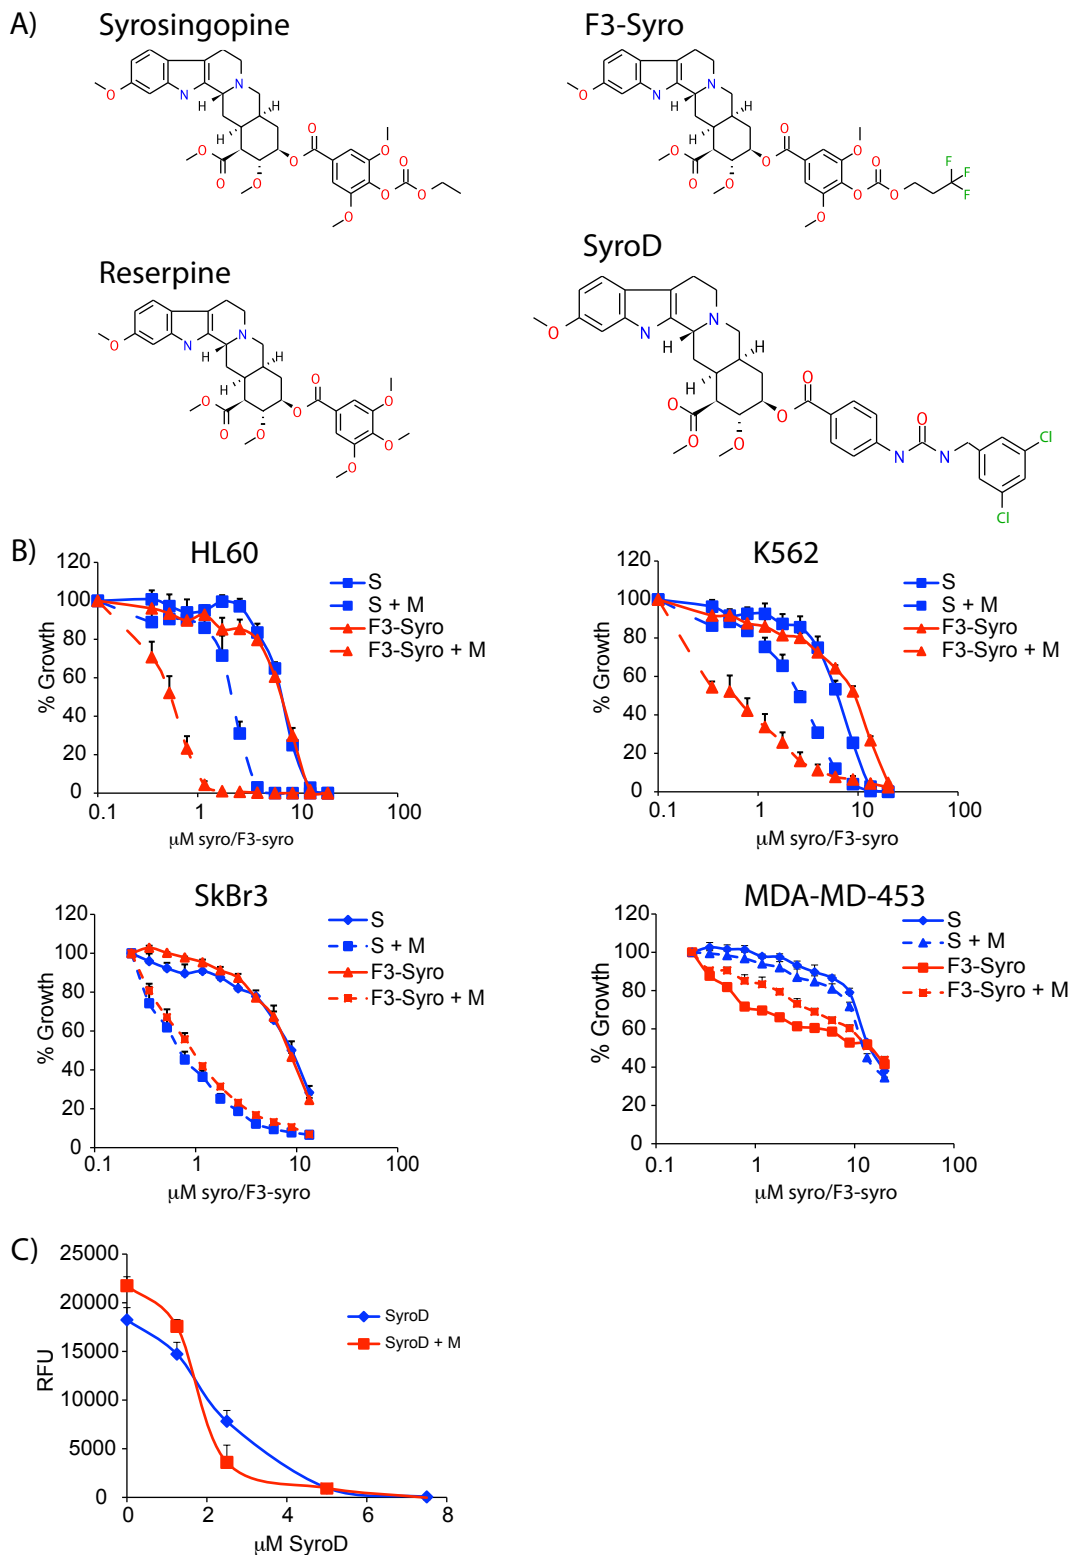

**Figure S1. Relative potency of syrosingopine derivatives for synthetic lethality with metformin. Related to Figures 1 and 2. (A)** Structures of the parent compound reserpine and its derivatives syrosingopine and F3-syro. SyroD is inactive in eliciting synthetic lethality with metformin. **(B)** Synthetic lethality between syrosingopine (S) or F3-syro (F3-syro) and metformin (M) in the human cancer lines HL60, K562, SkBr3 and MDA-MB-453. **(C)** Proliferation of HL60 cells titrated with SyroD in the presence/absence of metformin. Survival was measured after 3 days of drug treatment. All data points were measured in triplicate, represented as mean +/- SEM.

**Fig S2**

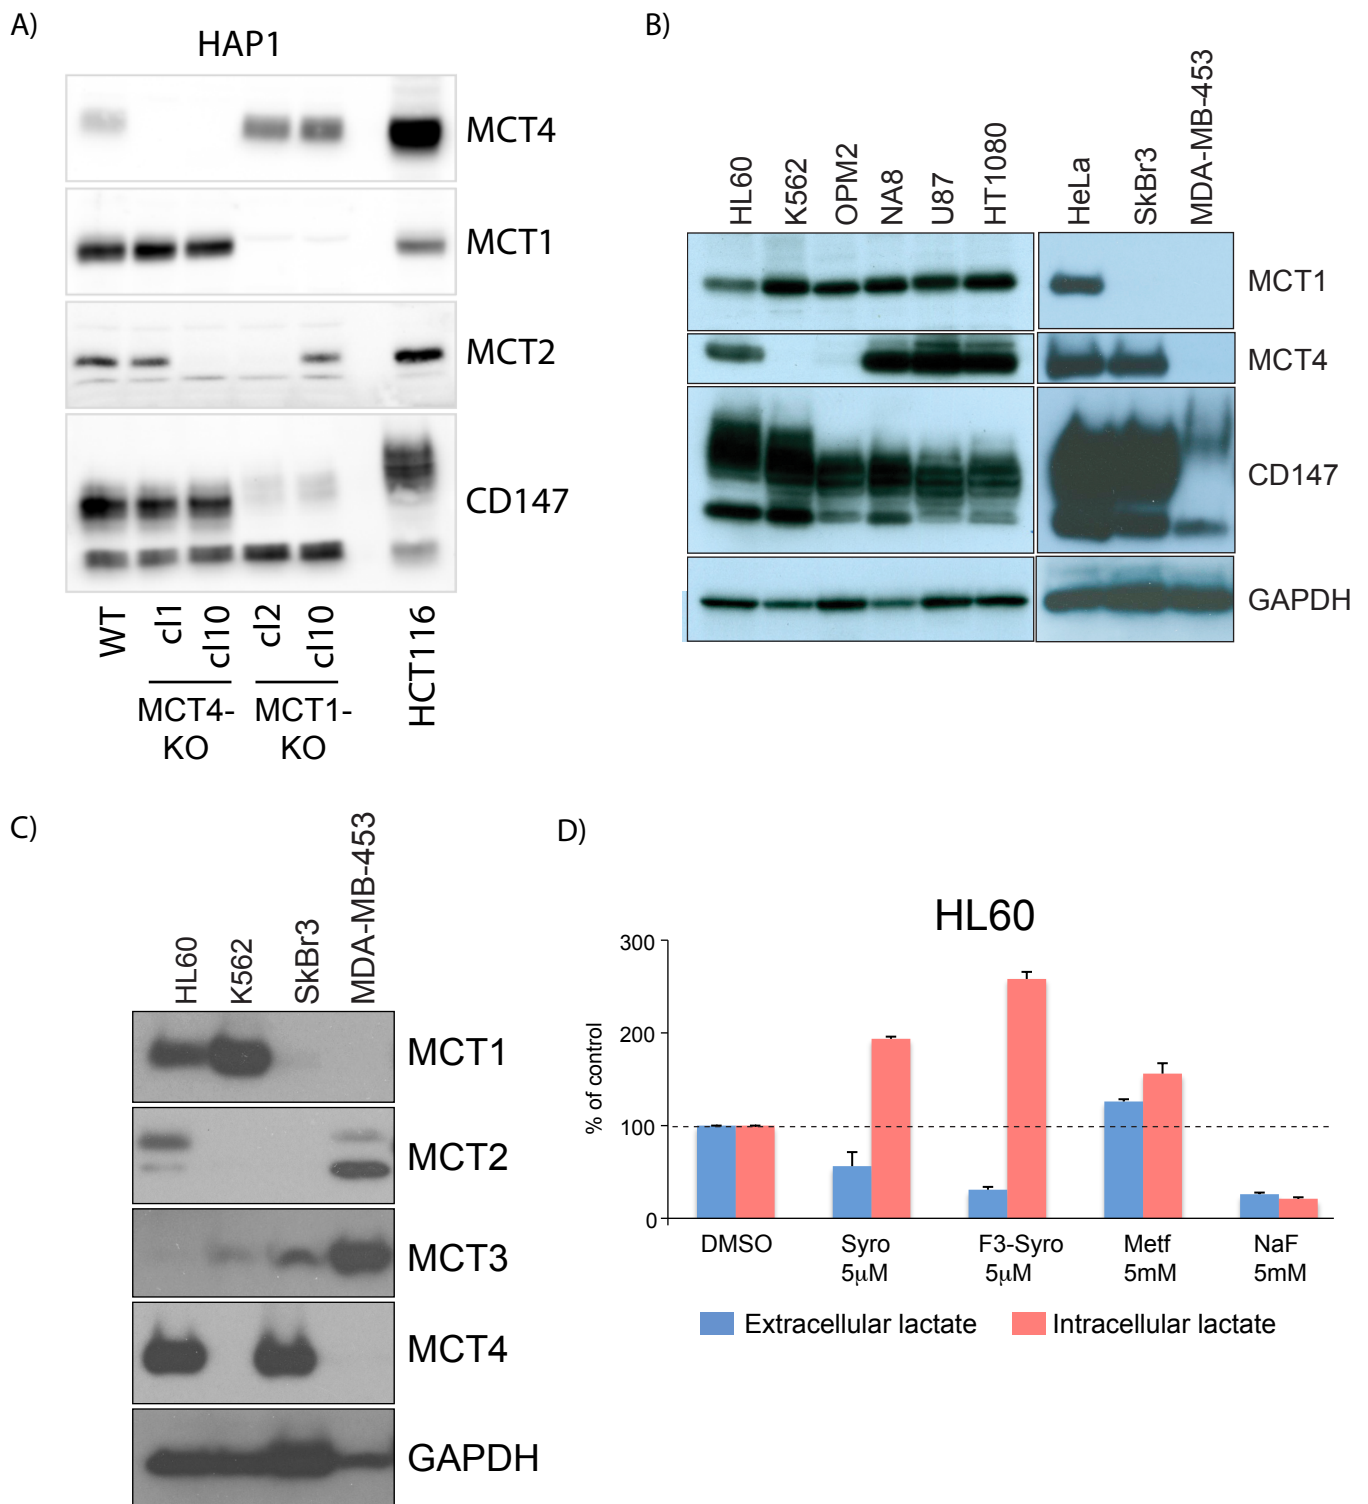

**Figure S2. MCT isoform expression in HAP1 MCT-knockout panel and human cancer cell lines. Related to Figures 2, 3 and 5. (A)** Immunoblot of HAP1 cells deleted for MCT1 (clones cl2 and cl10) or MCT4 (clones cl1 and cl10). **(B)** Immunoblot for MCT1 and MCT4 expression and their chaperone CD147 in various human cancer cell lines. HL60, K562, SkBr3 and MDA-MB-453 were selected to compose a cell panel. **(C)** Immunoblot of MCT1-4 in the cell panel. **(D)** Extra- and intra-cellular lactate levels in HL60 cells after 6 hours of treatment with syrosingopine, F3-syro, metformin and the glycolytic inhibitor NaF. All data points were measured in duplicate, bars are mean +/- SEM.

## Figure S3

### (A) Lactate Export Assay

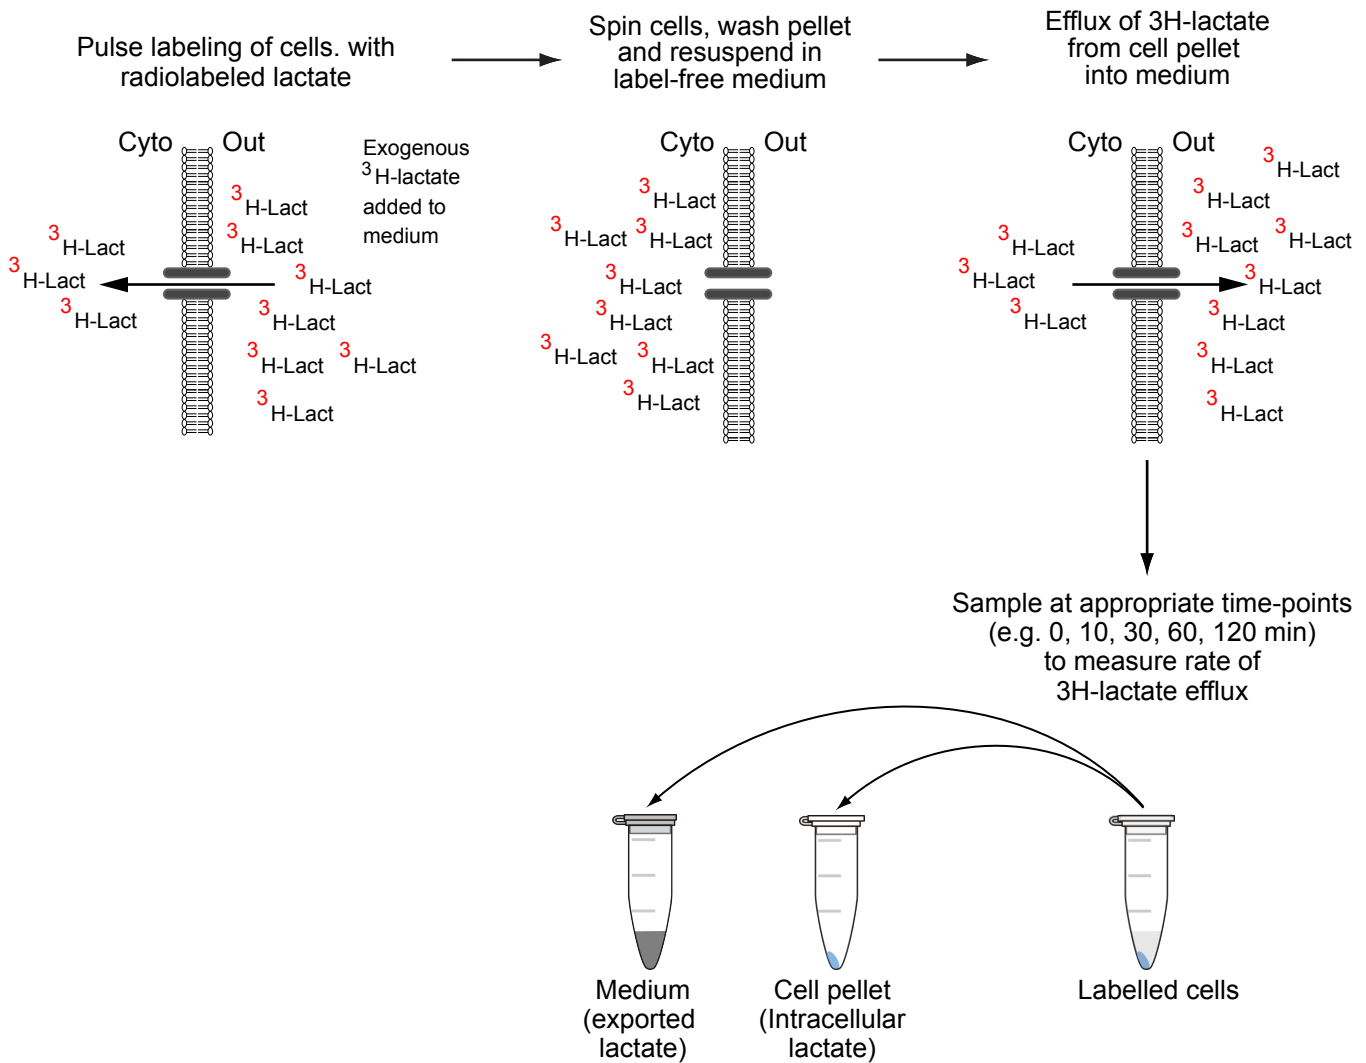

### (B) Lactate Uptake Assay

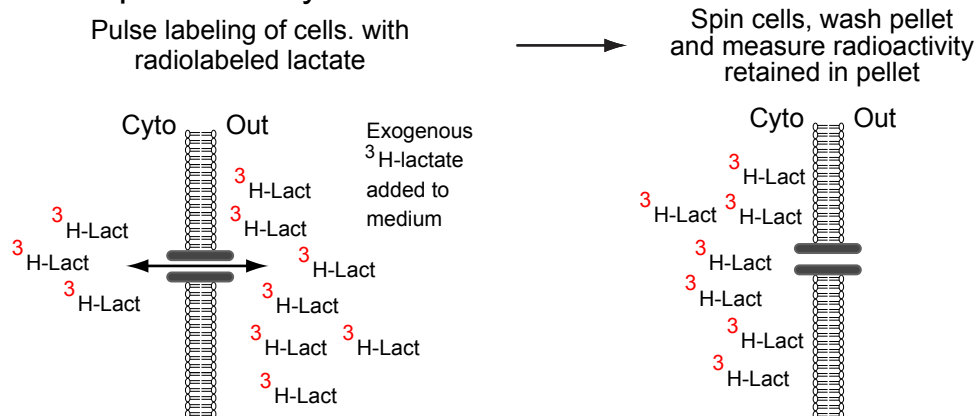

**Figure S3. Schematic diagrams of radioactive lactate transport assays. Related to Figures 3 and S4. (A) lactate export assay and (B) lactate uptake assay.**

## Figure S4

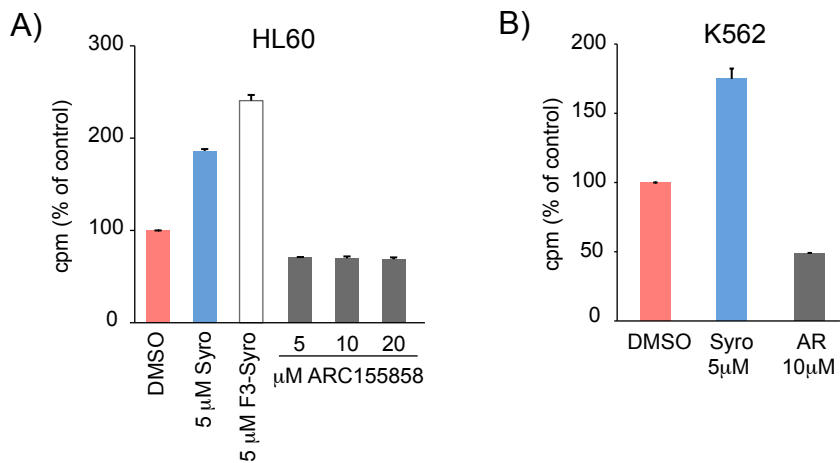

**Figure S4. Radioactive lactate uptake and the effect of indicated drugs. Related to Figure 3.** Radioactive lactate present in the cell pellet of (A) HL60 and (B) K562 cells. Labeling pulse was 1 hour. Each data point was measured in duplicate, bars are mean  $\pm$  SEM.

**Figure S5**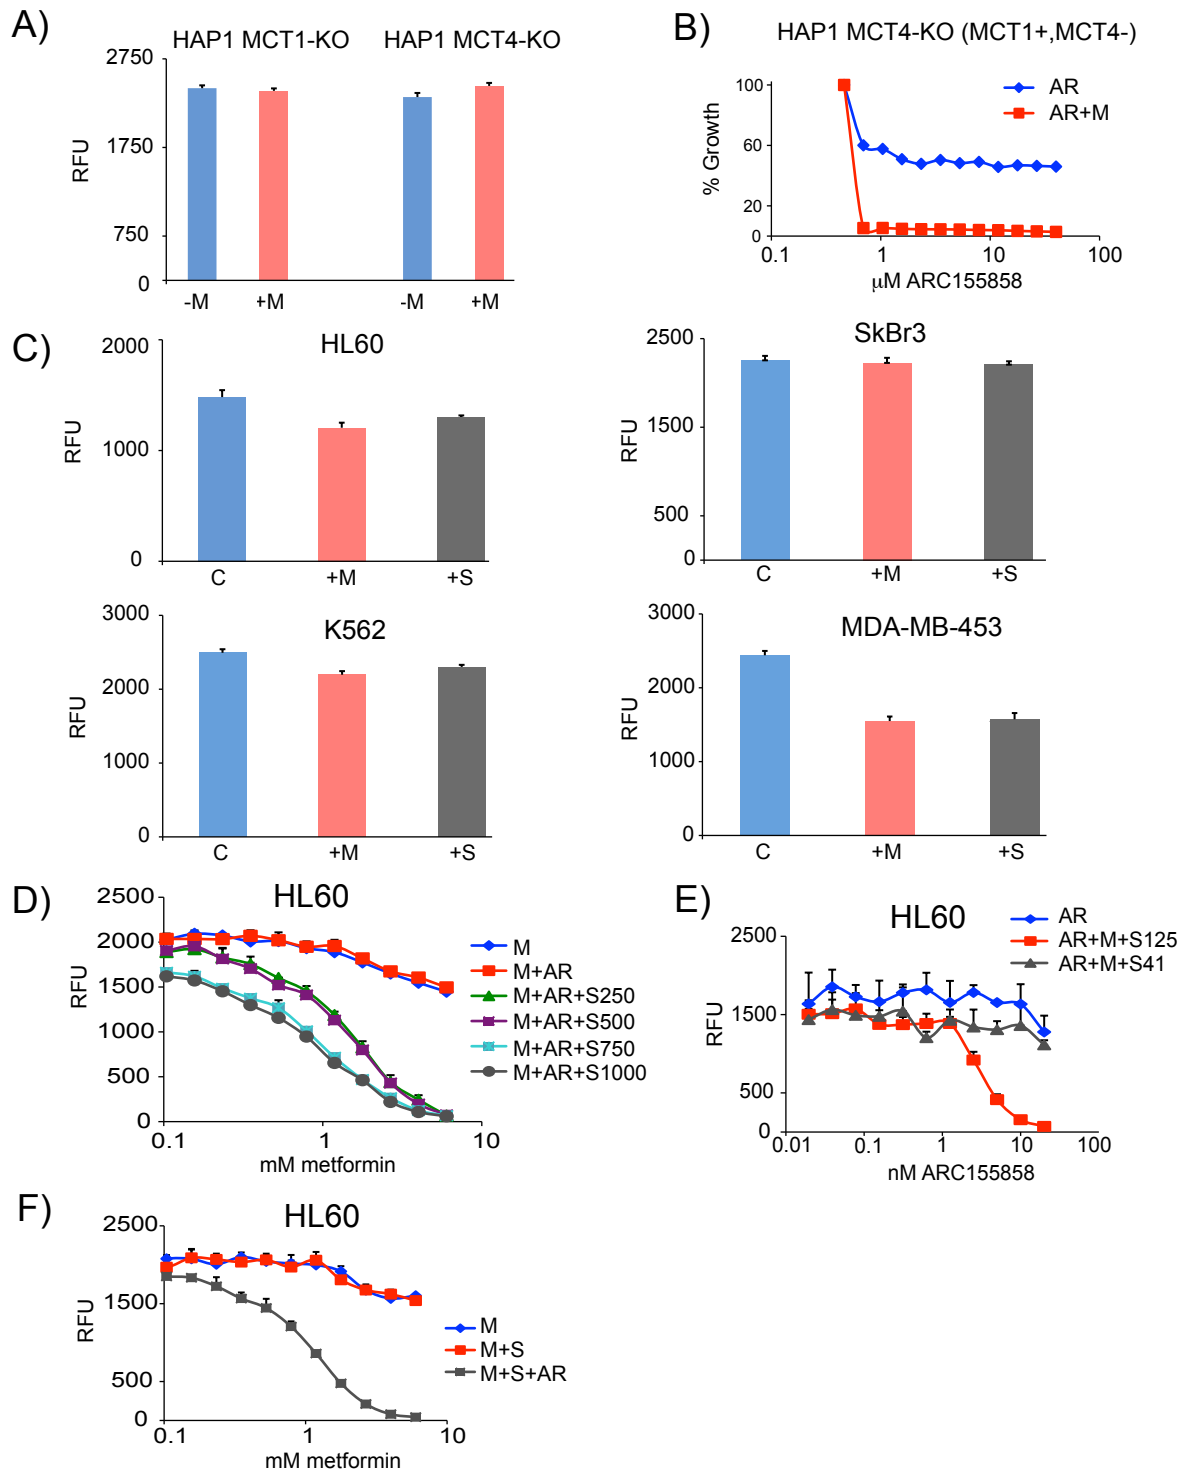

**Figure S5. Survival curves of cell line models with varying combinations of metformin, syrosingopine and ARC155858. Related to Figure 5. (A)** 4mM metformin (M) has no impact on proliferation in HAP1 MCT1-KO and MCT4-KO cells. **(B)** Survival curve of HAP1 MCT4-KO cells treated with the MCT1 inhibitor ARC155858 (AR), alone or in combination with 4mM metformin. **(C)** Effect of metformin (4mM) and syrosingopine (S, 0.5 $\mu\text{M}$ ) on proliferation in HL60, K562, SkBr3 and MDA-MB-453 cells. **(D)** Triple drug combination in HL60. Cells were titrated with metformin alone or in a background of 20nM ARC155858 and syrosingopine at various concentrations (250, 500, 750, 1000nM). **(E)** HL60 cells treated with increasing concentrations of ARC155858 in the presence of metformin (4mM) and syrosingopine (41 and 125nM). **(F)** HL60 cells treated with increasing concentrations of metformin in the presence of syrosingopine (1 $\mu\text{M}$ ) and ARC155858 (20nM). Growth measured after 3 days. Data points were measured in triplicate and show as mean  $\pm$  SEM. RFU = relative fluorescence units

## Figure S6

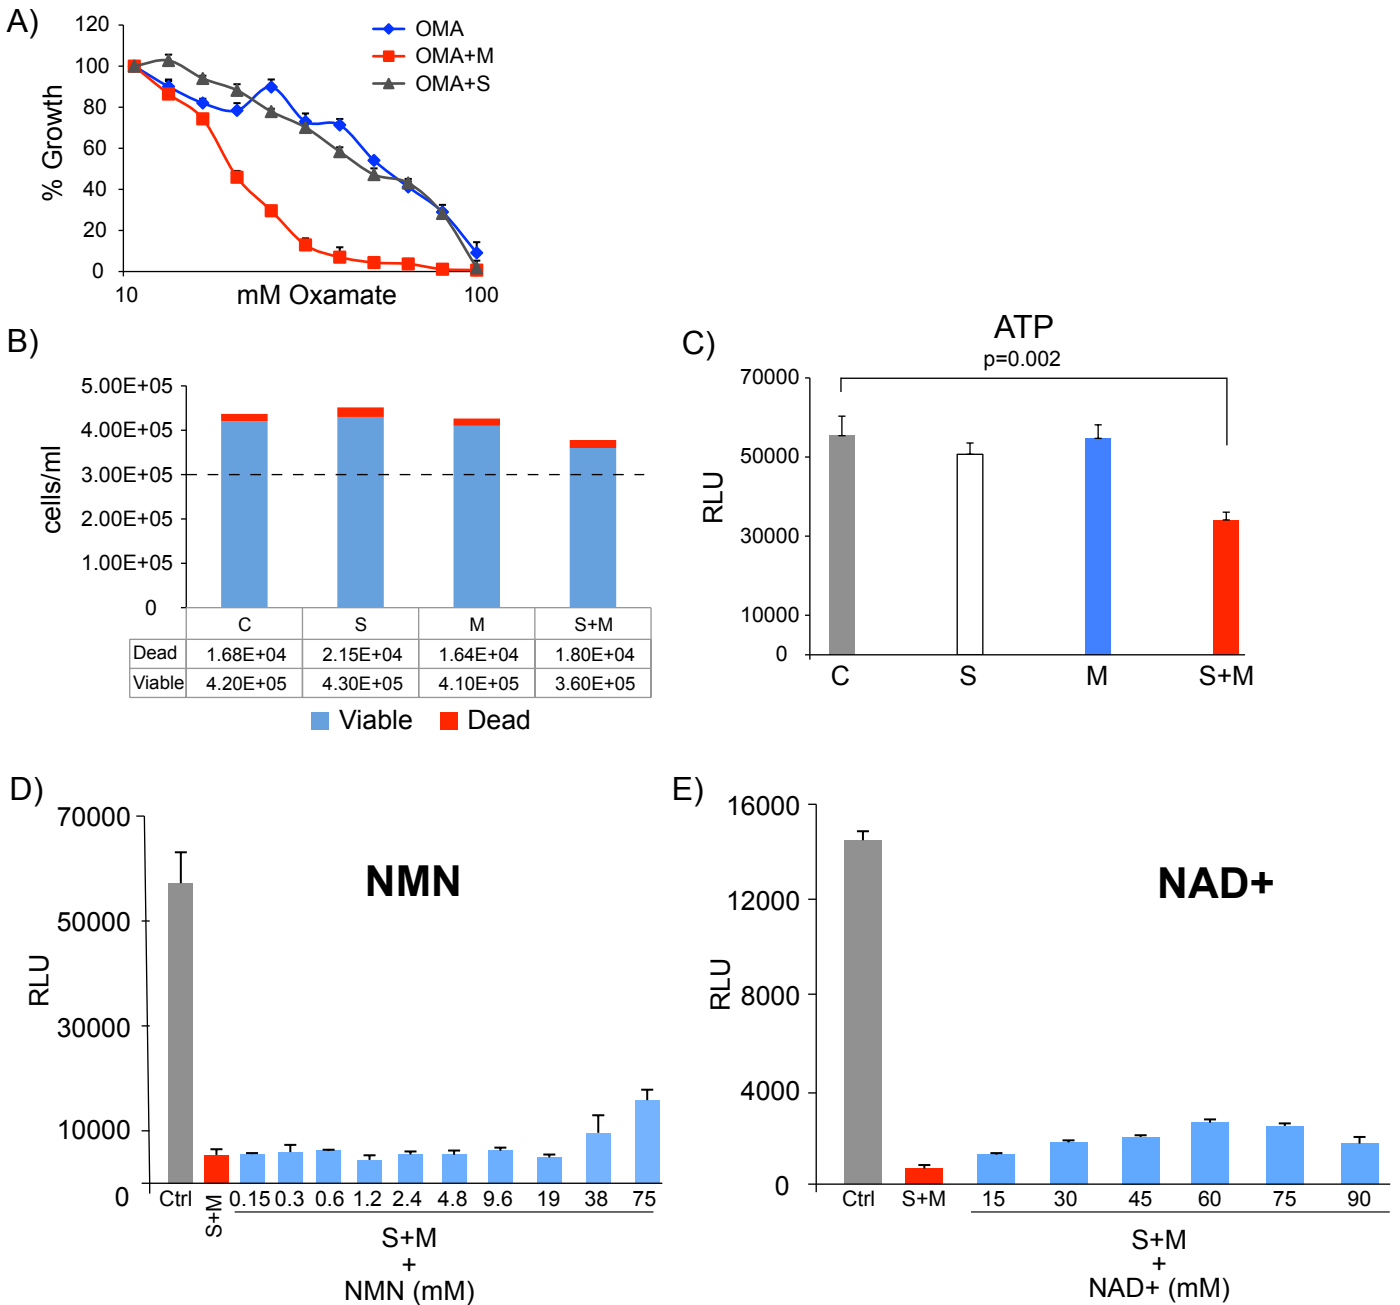

### Figure S6. Syrosingopine-metformin treatment impacts NAD<sup>+</sup>/NADH metabolism.

**Related to Figure 6. (A)** 3-day proliferation assay of HL60 cells titrated with the LDH inhibitor oxamic acid (OMA), and in combination with metformin (M, 4mM) or syrosingopine (S, 4 $\mu$ M). Data points were measured in triplicate, error bars are mean  $\pm$  SEM. **(B)** Cell viability counts of HL60 cells after metformin (4mM) or syrosingopine (5 $\mu$ M) treatment for 8 hours, slight growth retardation but no drop in viability was observed for S+M treated cells. Initial cell density shown in dotted line. **(C)** ATP levels of cells in (B) after normalisation for cell numbers. For (B,C) parallel experiments were conducted and data points measured in duplicate. **(D, E)** ATP levels in HL60 cells treated for 30 hours with 5 $\mu$ M syrosingopine and 4mM metformin (S+M). Increasing amounts of NMN or NAD<sup>+</sup> were titrated in S+M treated cells. Data points measured in duplicate, bars are mean  $\pm$  SEM.

RLU = relative light units
